# Supplementary material for: GRDC-Caravan: extending Caravan with data from the Global Runoff Data Centre
Source: Copernicus journal article supplement (doi:10.5194/essd-2024-427), 2024-11-13
Supplement: Supplementary file [file essd-2024-427-AC1-supplement.pdf]

## Response to Reviews

*We thank the reviewers for their thorough and constructive evaluation and feedback. We have tried to respond to all comments as well as possible. Please find our reply to RC1 below.*

### RC1

This manuscript introduces the GRDC-Caravan dataset, which extends the Caravan hydrology dataset by incorporating discharge data from the Global Runoff Data Centre (GRDC). By expanding spatial and temporal coverage to over 5,000 stations in 25 countries, it's clear that this work makes an important contribution to large-sample hydrology (LSH). The dataset is particularly valuable for underrepresented regions, providing a solid foundation for global hydrological research while aligning with open science principles. Personally I feel impressed by both the valuable job of GRDC as institution and the initiative of the team to further contribute with this Caravan extension. I am sure that this will provide a powerful new dataset for the hydrology community. While the manuscript is undeniably significant and deserves publication, there are a few minor areas that need improvement to meet the standards of *Earth System Science Data* (ESSD). Addressing these issues will help improve clarity, structure, and reproducibility. With these adjustments I believe that the paper will be ready for the journal.

*Thank you very much for your positive feedback. We have revised the manuscript according to your comments in order to improve the clarity, structure and reproducibility of the paper.*

### Suggestions for improvement

#### **1. Manuscript Structure:**

The manuscript lacks a clear distinction between methods and results, making it difficult to follow.

Please consider splitting the "Dataset Description" section into two separate sections: "Methodology" and "Dataset Description."

*Thank you for this helpful suggestion. The point has also been addressed in the second review and we followed this suggestion. The manuscript now contains a chapter "Methodology" and "Dataset Description". We left most of the previous chapter in the Methodology and shifted only the parts, which were describing the dataset itself to the new chapter. The Dataset Description was improved and contains now a better description of the dataset itself as well as a comparison to the core Caravan dataset.*

#### **2. Figures and Captions**

I have the impression that while the figures are visually informative, they lack context and detailed descriptions.

Improve captions to explain the figures' relevance to the dataset's purpose

*We have followed this suggestion as best as possible. We have critically reviewed the figure captions and have tried to improve them where necessary.*

Provide more discussion of the figures in the main text to guide readers

*We have followed this suggestion and have improved the description and linkage of figures in the text.*

### **3. Comparisons with Existing Datasets**

I feel that the paper presents a limited discussion of how GRDC-Caravan compares with other LSH datasets.

Add a detailed overview of LSH releases. Where did it start? MOPEX? CAMELS? Which are the main datasets currently available? Which countries are covered? How did Caravan arrive to existence? What about other datasets and similar initiatives? GSIM? How is the situation of LSH datasets by the end of 2024?

*We have critically examined this point and would like to point out that a brief review of the mentioned history of LSH and main datasets (including MOPEX, GSIM, CAMELS and Caravan extensions) has been already provided in paragraph 2 and 3 of the introduction. We have also added text to the outlook section (see second paragraph) to summarise the current state of LSH and the importance of LSH datasets. We think that a full review of LSH would go beyond the scope of this data description paper. However, we improved the existing review and tried to highlight the link of the GRDC-Caravan extension with existing initiatives.*

Include a comparative analysis highlighting GRDC-Caravan's unique contributions (e.g., coverage in underrepresented regions, temporal/spatial resolution, data quality). Remember that you should sell the idea of why GRDC-Caravan matters.

*We understand that the uniqueness of the GRDC-Caravan extension did not become clear in the initial submission. We have extended the abstract and the introduction with a better explanation how GRDC-Caravan significantly contributes to the spatial coverage of Caravan, including the extension of the times series to 70 years. A more detailed description and comparison to the core Caravan dataset is now also provided in the updated chapter "Dataset description". We have also updated Fig. 2 and 3, which include now also a comparison between our dataset and the core Caravan dataset.*

### **Data Records and Repository Description**

I feel that there is still insufficient details about the organization of the Zenodo repository and dataset files.

Describe the repository structure, including folders and file organization. Of course, a further description of the data included, and units is already provided by Caravan, but for users, it is always beneficial to know what to expect after the download.

*We refer the comment to the description of the repository in the manuscript and not the organization of the repository itself. The organization of the repository has been already improved with a data description file before the review (requested by the editor). However, we followed the comment and added a subchapter on “Dataset structure” in the “Methodology” in order to make the organization of the repository and dataset files clearer. Please note that version 0.4 of the Zenodo repository now also includes a preview of the files (<https://zenodo.org/records/14725028>).*

L245: Specify the version number of the dataset being referred to on Zenodo. Pay attention to always place the specific version being described in the paper, not the general DOI for all versions.

*We have checked the doi in the manuscript. It is referring to the specific version 0.4 described in the paper (10.5281/zenodo.14725028), not the general doi (10.5281/zenodo.8425586).*

## **5. Reproducibility and Code Availability**

The authors state that the GRDCFlowTools R package is only available upon request, limiting reproducibility.

If possible, publish the package on a public repository (e.g., GitHub or CRAN). Include usage examples to facilitate adoption and reproducibility.

*We have now published the package on GitHub in order to increase the reproducibility. It also includes usage examples (<https://github.com/bafg-bund/GRDCFlowTools>).*

## **6. Duplicates**

While the authors acknowledge, the duplicated catchments are not explicitly labeled in the dataset.

If possible, consider adding a column that identifies duplicated catchments in the dataset.

*We have discussed this issue and have decided not to place the duplicates in a separate column in the dataset. However, the duplicates are now explicitly labelled in Fig. 2 and are better explained in the dataset description. The new subchapter “dataset structure” also explains how duplicates can be found based on the file `national_station_ids.csv`:*

*“The attribute ‘nat\_id’, which is the national station code for each gauge station, allows the user to find duplicates between GRDC station codes and stations that are already included in Caravan”*

## **7. Dataset Analysis and Validation**

This paper already covers a clear description of the dataset being published. But to be fair to other similar dataset papers published in ESSD, it indeed lacks a bit of an overview and preliminary analysis of such dataset, which could also act as a technical validation of what is being published. While I see that the GRDC makes available data which has been checked by the NMHS, I think that future users could benefit from a general overview, which could also act as a validation. Personally,

I do not see the need to perform any modelling analysis with the data as previous artiodactyls papers have done.

Include plots showing spatial distributions of key streamflow signatures and climatic indices (e.g., Q mean, BFI, aridity).

Try to include a creative plot showing an overview of this new discharge data for users. Why not some small boxplots of the Q mean covered among the GEnS climatic zones? Something inspired in Figure 4 by Marvin Höge et al. 2024 in CAMELS\_CH? Take this as a suggestion (inspiration), not a requirement.

*We have thoroughly discussed this comment and have decided not to conduct further dataset analysis and validation. We think that an in depth analysis of the dataset would go beyond the scope of a data description paper as defined by ESSD:*

*“Although examples of data outcomes may prove necessary to demonstrate data quality, extensive interpretations of data (...) remain outside the scope of this data journal. ESSD data descriptions should instead highlight and emphasize the quality, usability, and accessibility of the dataset (...) and should describe extensive carefully prepared metadata and file structures at the data repository.”*

*We think that Fig. 3 already gives a similar overview as Höge et al. 2024, showing the distribution of our dataset along climate zones. While Höge et al. 2024 are providing a regional dataset (CAMELS-CH), our dataset is on the global level and we consider a global map of catchments too difficult to interpret. However, we have improved the description of the dataset in the text in order to better explain its composition and spatio-temporal contribution.*

Validate catchment boundaries with visual aids or references to prior successful applications of MERIT Hydro and delineator.py.

*We have followed this comment and provided prior successful applications of MERIT Hydro and delineator.py in the text (l. 154).*

## **8. Outlook Section**

The outlook could be more concise and impactful.

Consider Emphasizing more the relevance of GRDC-Caravan for global hydrology. Describe the need for new Caravan extensions, and the Importance of open data policies from NMHS. Streamline the section to improve rhythm and flow.

*We followed the comment and have improved the outlook section.*

Specific points:

General:

Some sentences are long and complex, making them hard to follow. Please while reviewing the manuscript make sure to go through such points. For example:

L 171: Consider rephrasing "After the calculation of all potential pour points was completed, a rating score R was calculated..." to: "Once all potential pour points were calculated, a rating score (R) was assigned based on the following formula."

*The sentence has been rephrased as suggested.*

Introduction

L33–34: Please consider to rephrase "is the primary objective of the principal reason" to something in the lines of "The primary objective of the Global Runoff Data Centre (GRDC) is to (...)."

*The introduction has been rephrased and the sentence replaced.*

Dataset description

L115: Acknowledge that Figure 3 adapts elements from the original Caravan publication. Add a note in the caption, e.g., "This figure is adapted from the original Caravan publication (Kratzert et al., 2023)."

Citation: <https://doi.org/10.5194/essd-2024-427-RC1>

*We have improved the figure and have added information from the core Caravan dataset with a reference to the original publication. Therefore we think that a further note on figure adaption is not necessary.*
